# Supplementary material for: The effect of reduced graphene oxide on the dielectric and ferroelectric properties of PVDF–BaTiO3 nanocomposites
Source: Royal Society of Chemistry journal article supplement (doi:10.1039/c6ra03155b), 2016-01-01
Supplement: c6ra03155b1.pdf [file c6ra03155b1.pdf]

## Supporting information

### **The effect of reduced graphene oxide on the dielectric and ferroelectric properties of PVDF-BaTiO<sub>3</sub> nanocomposites**

Usman Yaqoob, A.S.M. Iftekhar Uddin, Gwiy-Sang Chung<sup>a</sup>

School of Electrical Engineering, University of Ulsan, 93 Daehak-ro, Nam-gu, Ulsan 44610, Republic of Korea

Electronic supplementary information

<sup>a</sup> E-mail address: [gschung@ulsan.ac.kr](mailto:gschung@ulsan.ac.kr) (G.-S. Chung)

URL: <http://home2.ulsan.ac.kr/user/gschung>

Tel.: +82-52-259-1248;

Fax: +82-52-259-1686

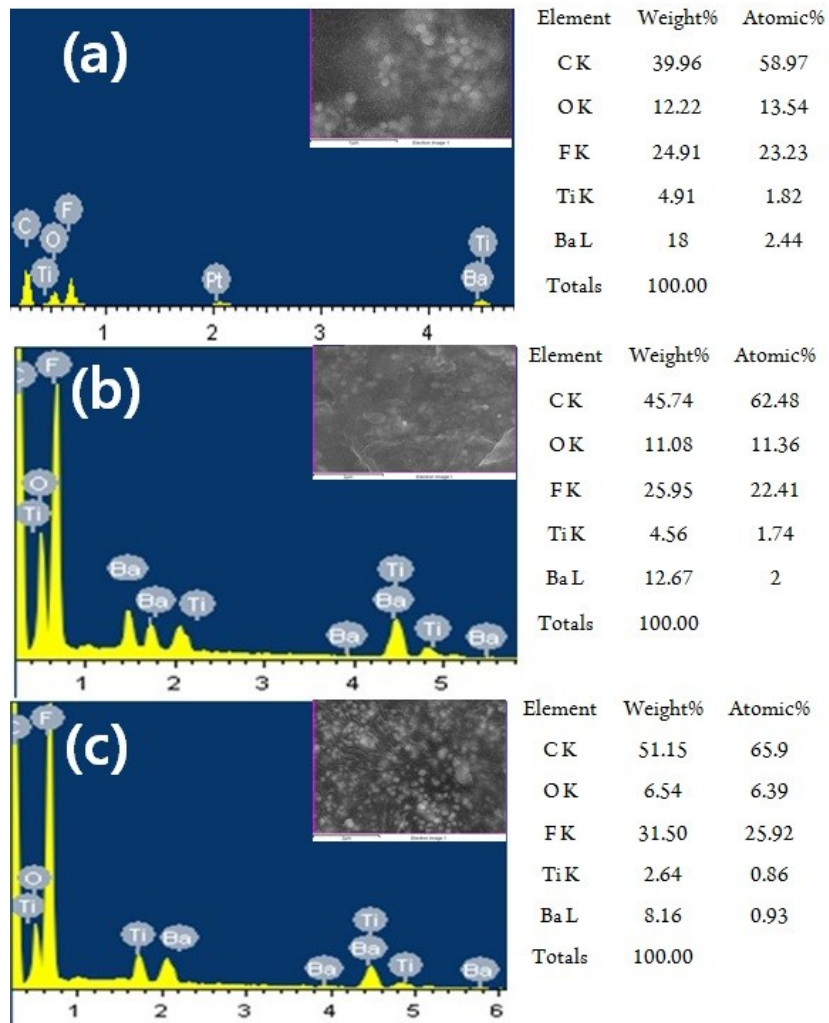

Figure S1. EDS results for (a) PRB1, (b) PRB2, and (c) PRB3 nanocomposites.

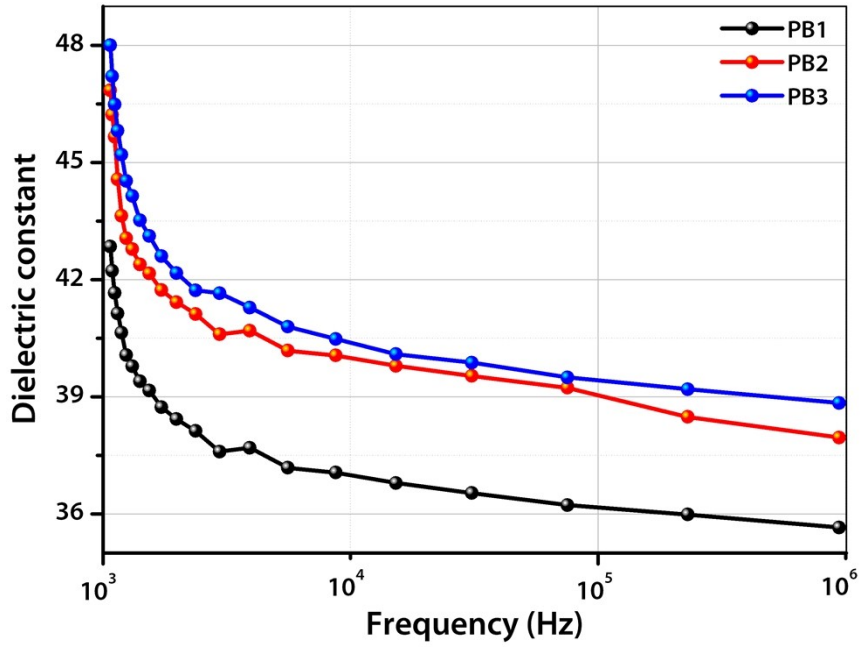

(a)

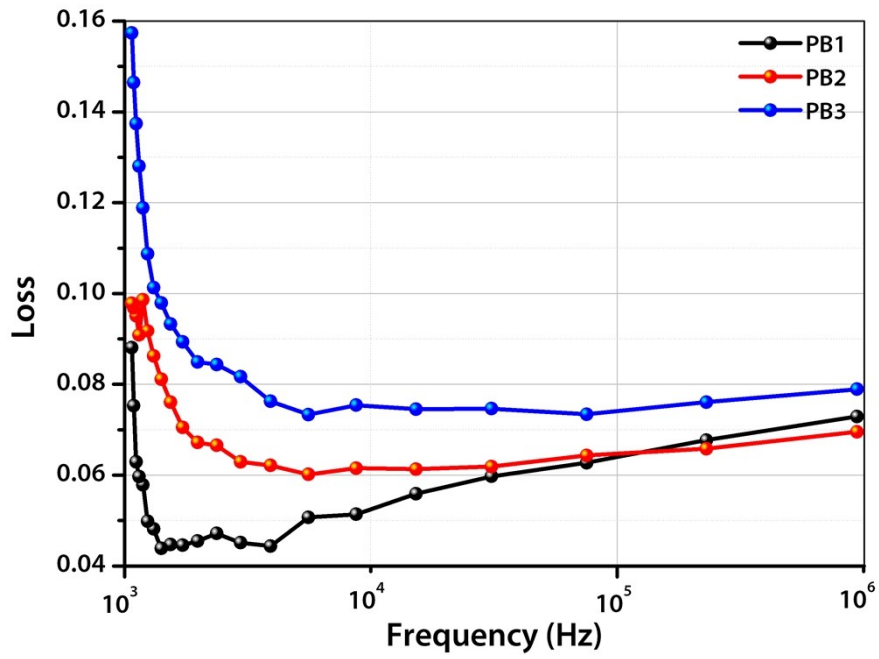

(b)

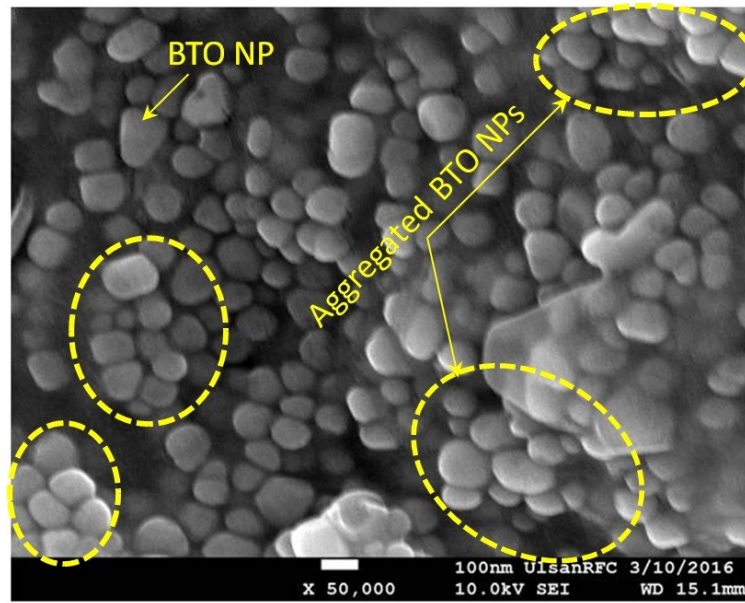

(c)

Figure S2. Dielectric properties of the PB1, PB2, and PB3 nanocomposites at different frequencies (a) dielectric constant (b) dielectric loss (c) SEM image of the PB3 sample.

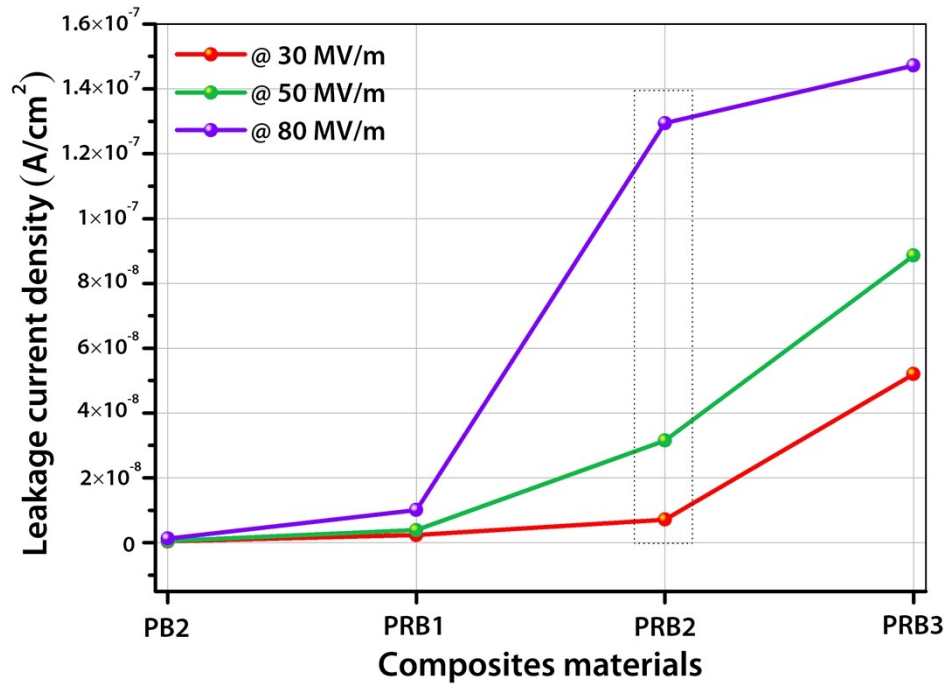

Figure S3. Leakage current density variations of PB2, PRB1, PRB2, and PRB3 nanocomposites at different electric fields

Table S1. Summary of Raman and FTIR peaks for PVDF-RGO-BTO nanocomposites.

| Analysis      | Samples | PVDF related peaks (cm <sup>-1</sup> ) |     |     |     |      |      | BTO related peaks (cm <sup>-1</sup> ) |     |     |     |     |
|---------------|---------|----------------------------------------|-----|-----|-----|------|------|---------------------------------------|-----|-----|-----|-----|
|               |         | 167                                    | 802 | 811 | 839 | 881  | 1170 | 185                                   | 258 | 308 | 515 | 720 |
| Raman spectra | PB2     | -                                      | α   | -   | β   | All  | -    | C                                     | T   | T   | C   | T   |
|               | PRB1    | -                                      | -   | γ   | β   | All  | β    | C                                     | T   | T   | C   | T   |
|               | PRB2    | β                                      | -   | γ   | β   | All  | β    | -                                     | T   | T   | -   | T   |
|               | PRB3    | β                                      | -   | γ   | β   | All  | β    | -                                     | T   | T   | -   | T   |
| FTIR spectra  | Peaks   | 760                                    | 797 | 838 | 876 | 1175 | 433  | 577                                   | 585 |     |     |     |
|               | PB2     | A                                      | α   | β   | β   | β    | T    | T                                     | T   |     |     |     |
|               | PRB1    | -                                      | -   | β   | β   | β    | T    | T                                     | -   |     |     |     |
|               | PRB2    | -                                      | -   | β   | β   | β    | T    | T                                     | -   |     |     |     |
|               | PRB3    | -                                      | -   | β   | β   | β    | T    | T                                     | -   |     |     |     |

Where:

α = alpha phase of PVDF

β = beta phase of PVDF

T = tetragonal phase of BaTiO<sub>3</sub>

T = cubic phase of BaTiO<sub>3</sub>
